# Supplementary material for: SedDARE-IB: an open-access repository of sediment data for the Iberian Peninsula and its continental margins
Source: Copernicus journal article supplement (doi:10.5194/essd-17-1275-2025), 2025-03-31
Supplement: Supplementary file 1 [file essd-17-1275-2025-supplement.zip]

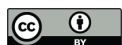

## *Supplement of*

# **SedDARE-IB: an open-access repository of sediment data for the Iberian Peninsula and its continental margins**

**Montserrat Torne et al.**

*Correspondence to:* Montserrat Torne ([mtorne@geo3bcn.csic.es](mailto:mtorne@geo3bcn.csic.es))

- [essd-17-1275-2025-supplement-title-page.pdf](#)
- [TableS1\\_Torne\\_et al\\_SedDARE-IB.xlsx](#)

The copyright of individual parts of the supplement might differ from the article licence.
